# Supplementary material for: Silencing of HMGA2 by siRNA Loaded Methotrexate Functionalized Polyamidoamine Dendrimer for Human Breast Cancer Cell Therapy
Source: MDPI journal article supplement (doi:10.3390/genes12071102), 2021-07-20
Supplement: s1 [file s1]

Supplementary data for the "Silencing of HMGA2 by siRNA loaded methotrexate functionalized polyamidoamine dendrimer for human breast cancer cells therapy " manuscript.

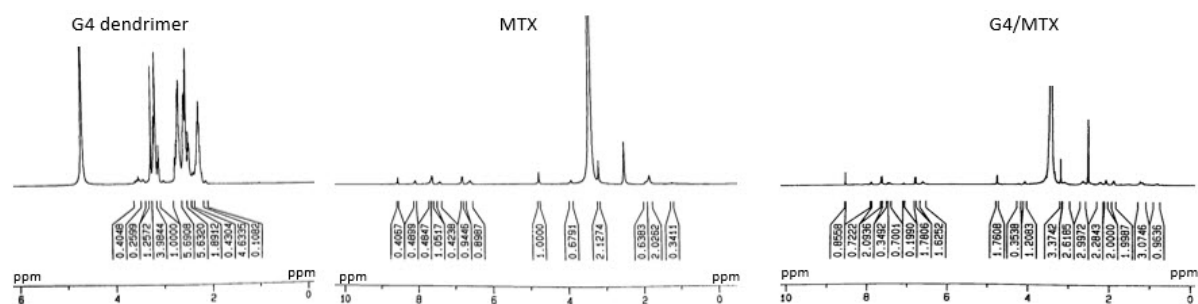

**Figure S1.** Representation of the NMR pack for G4, MTX and G4/MTX.
